# Supplementary material for: Cardiac Plin5 interacts with SERCA2 and promotes calcium handling and cardiomyocyte contractility
Source: PubMed Central journal article supplement (PMC9887753; doi:10.26508/lsa.202201690), 2023-01-30

Figure 3B

Coomassie

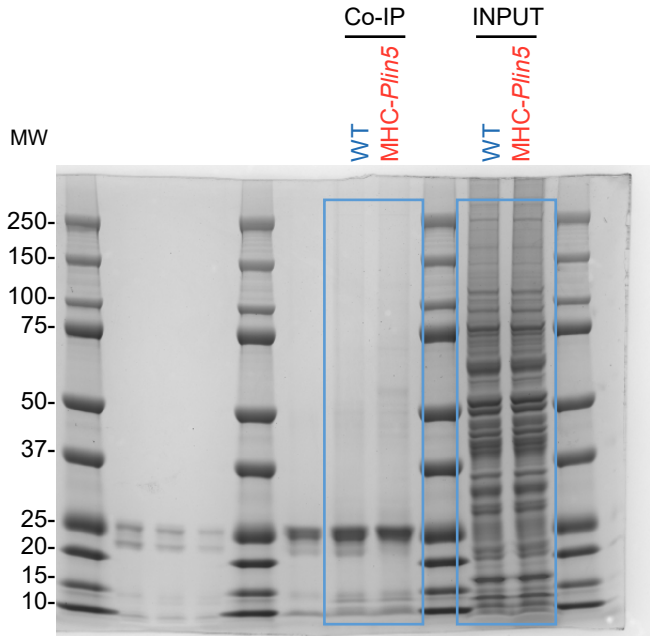

Figure 3C

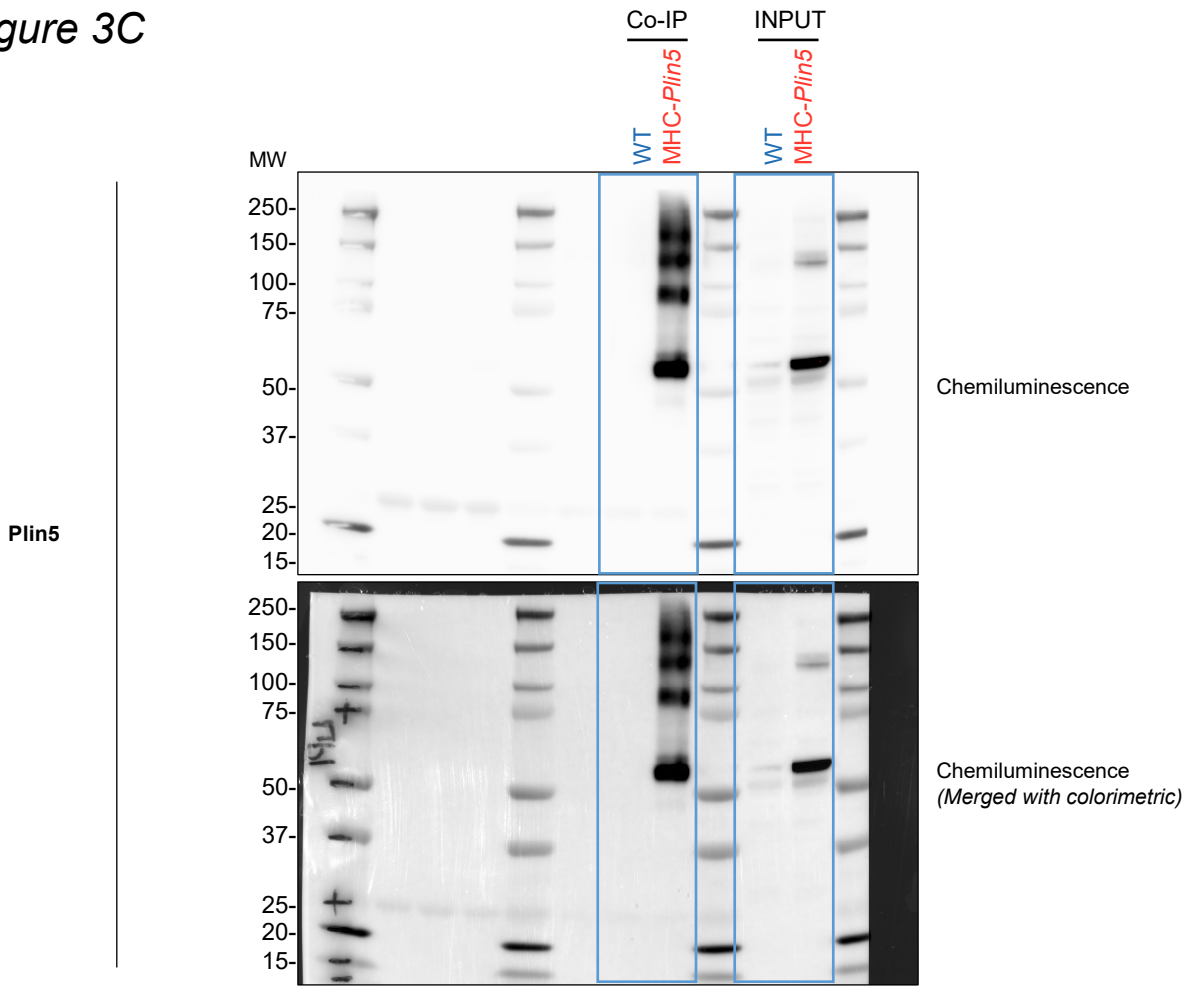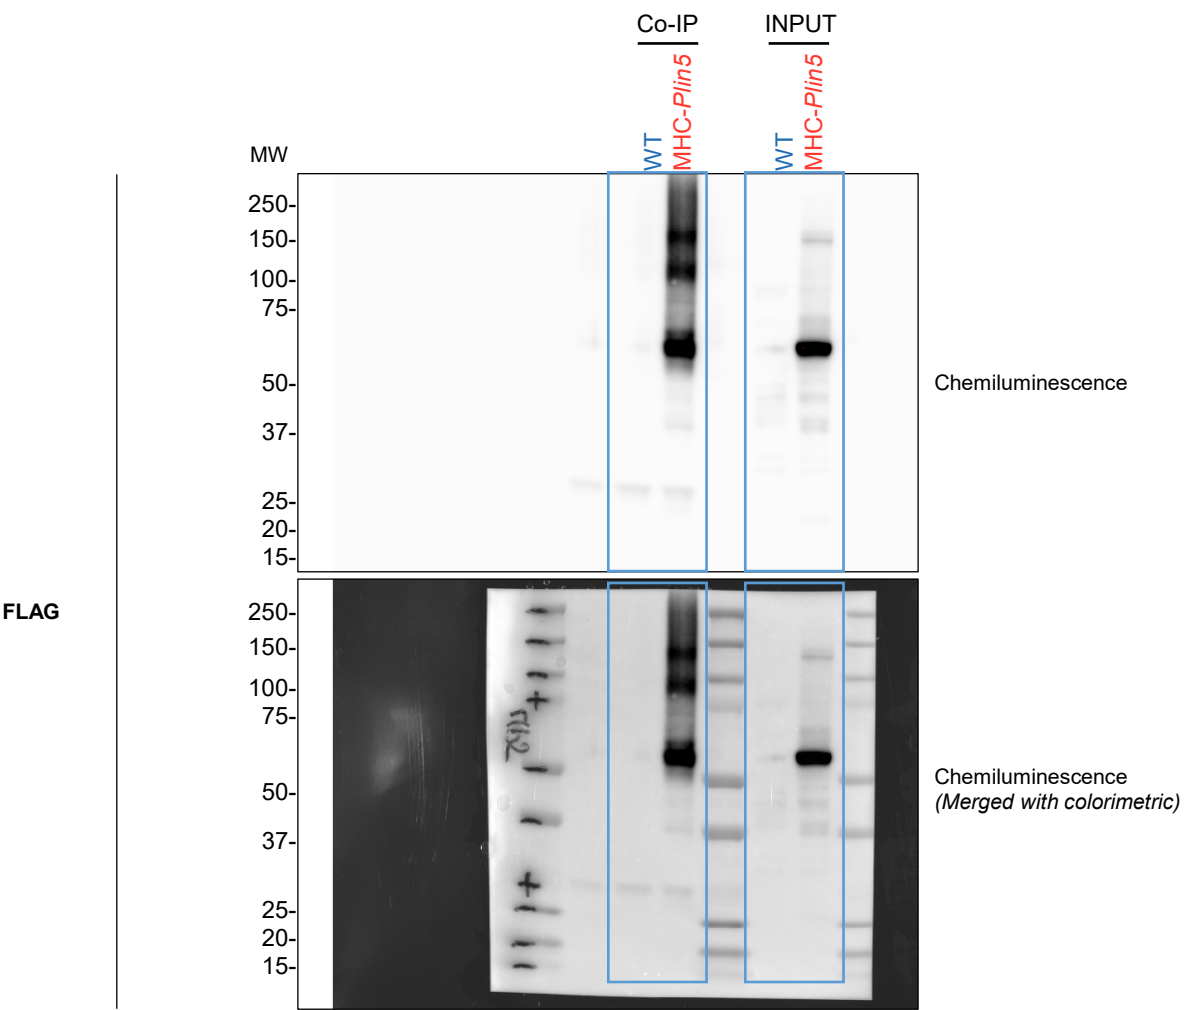

Figure 4A

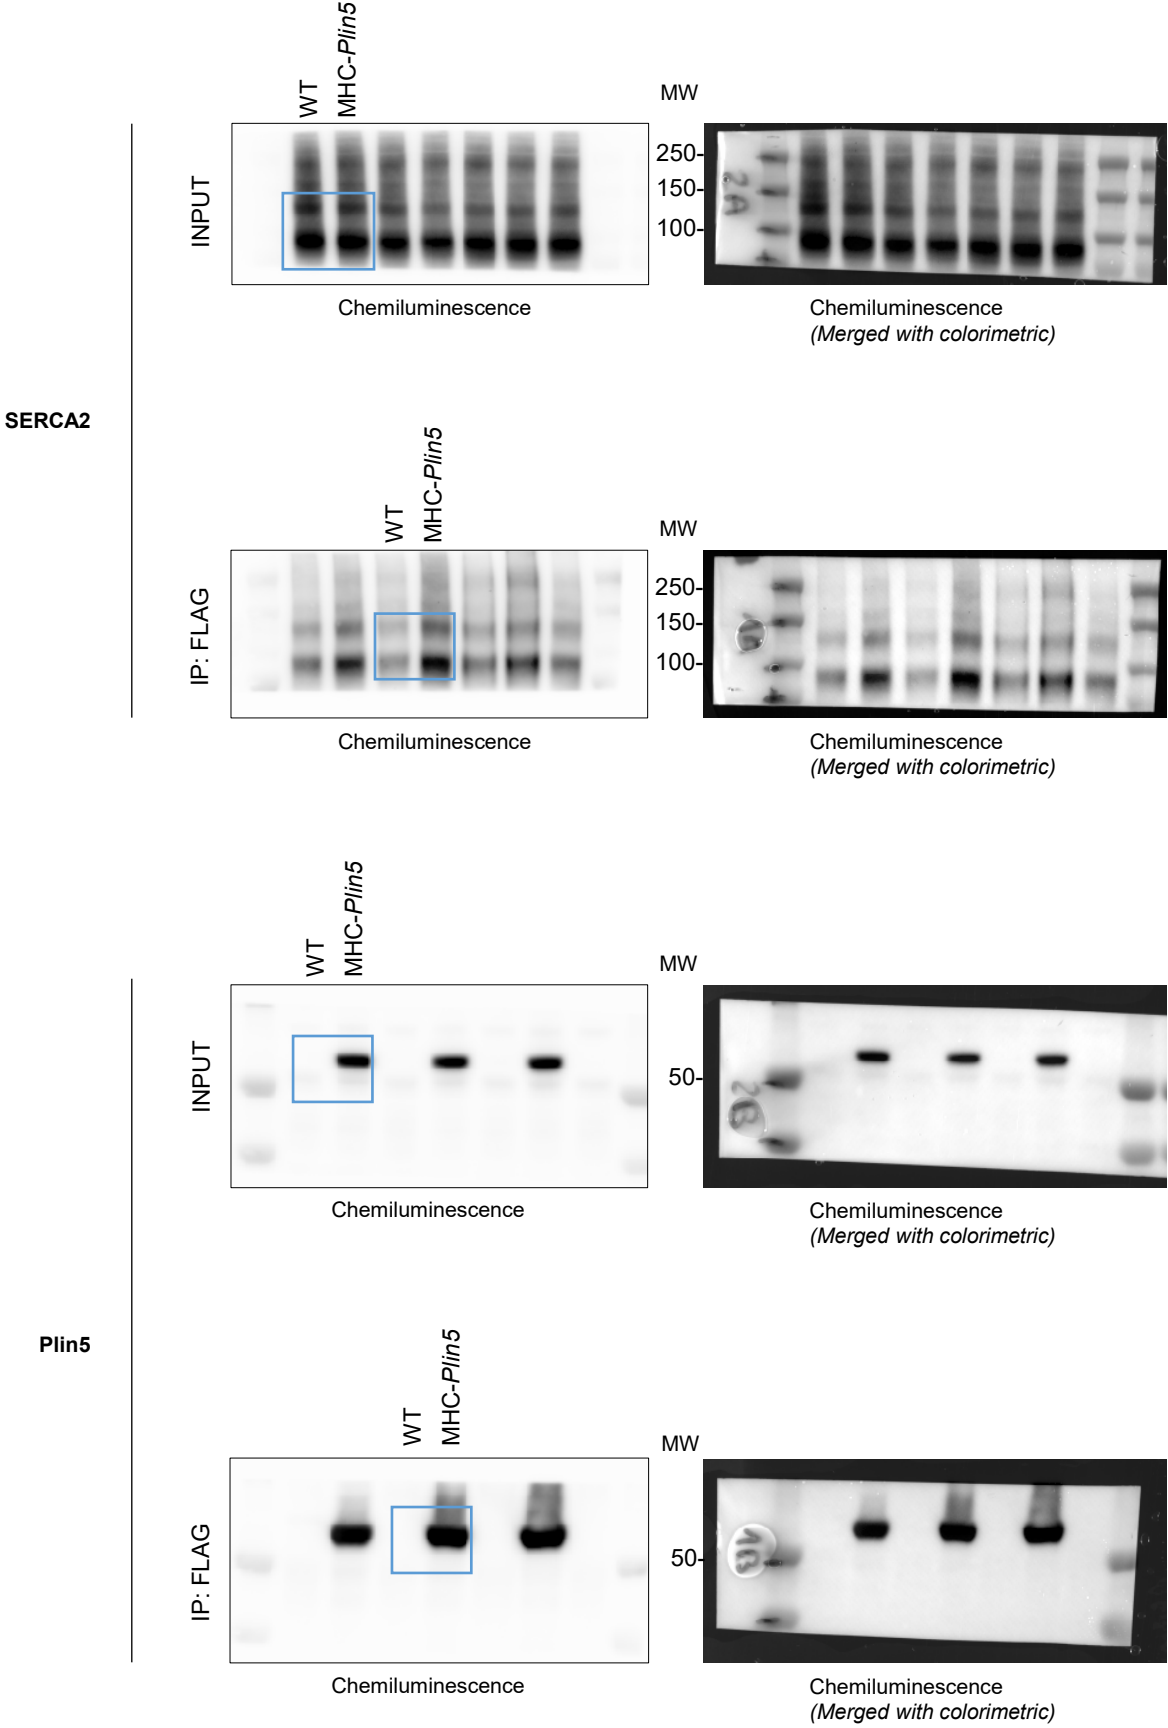

Figure 4B

SERCA2

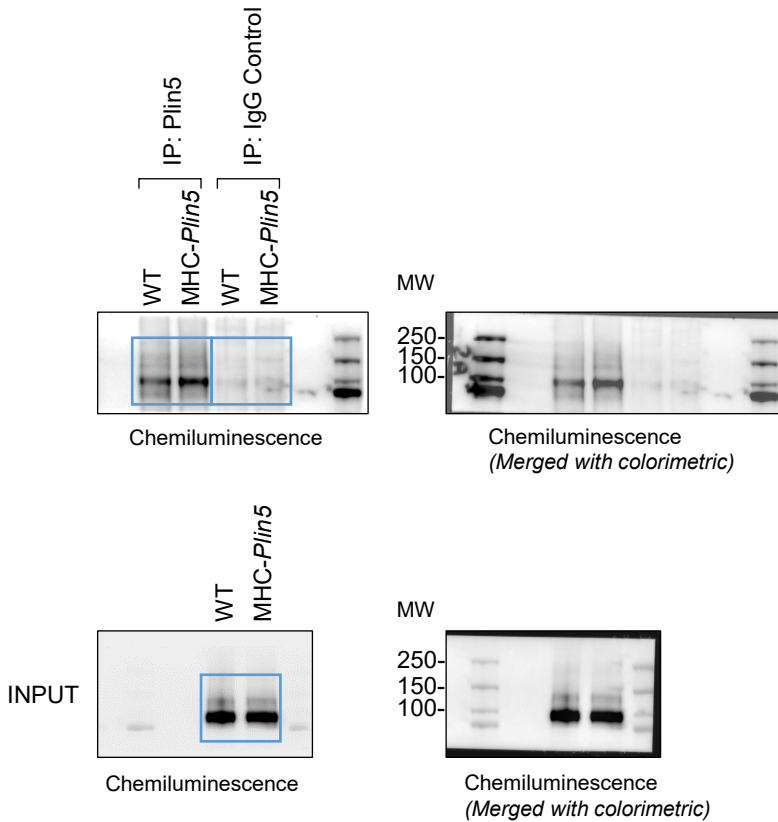

Plin5

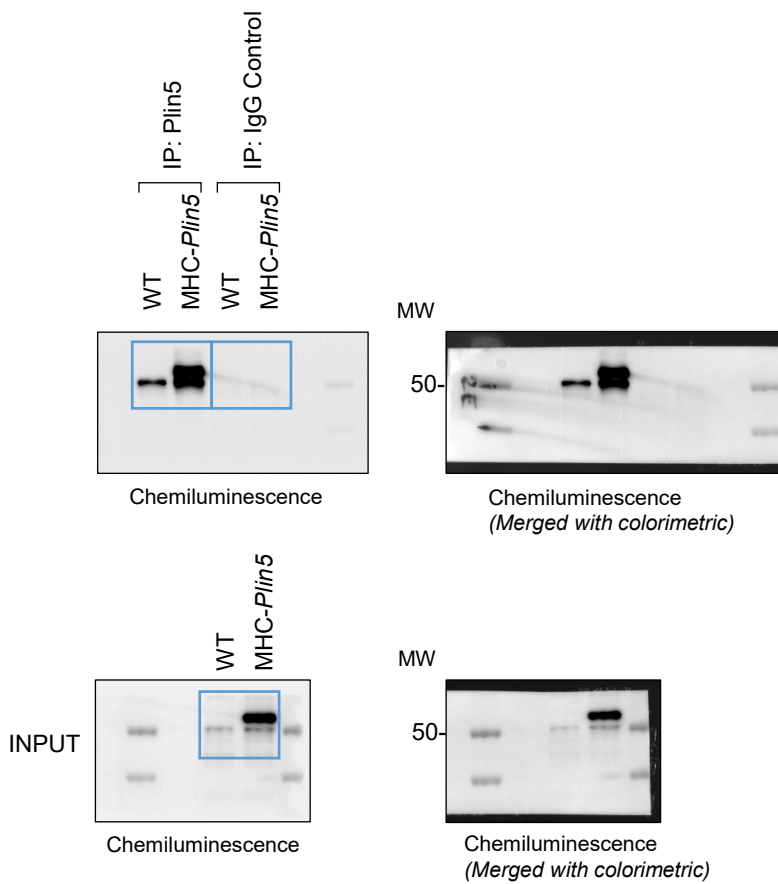

Figure 5B-Part1

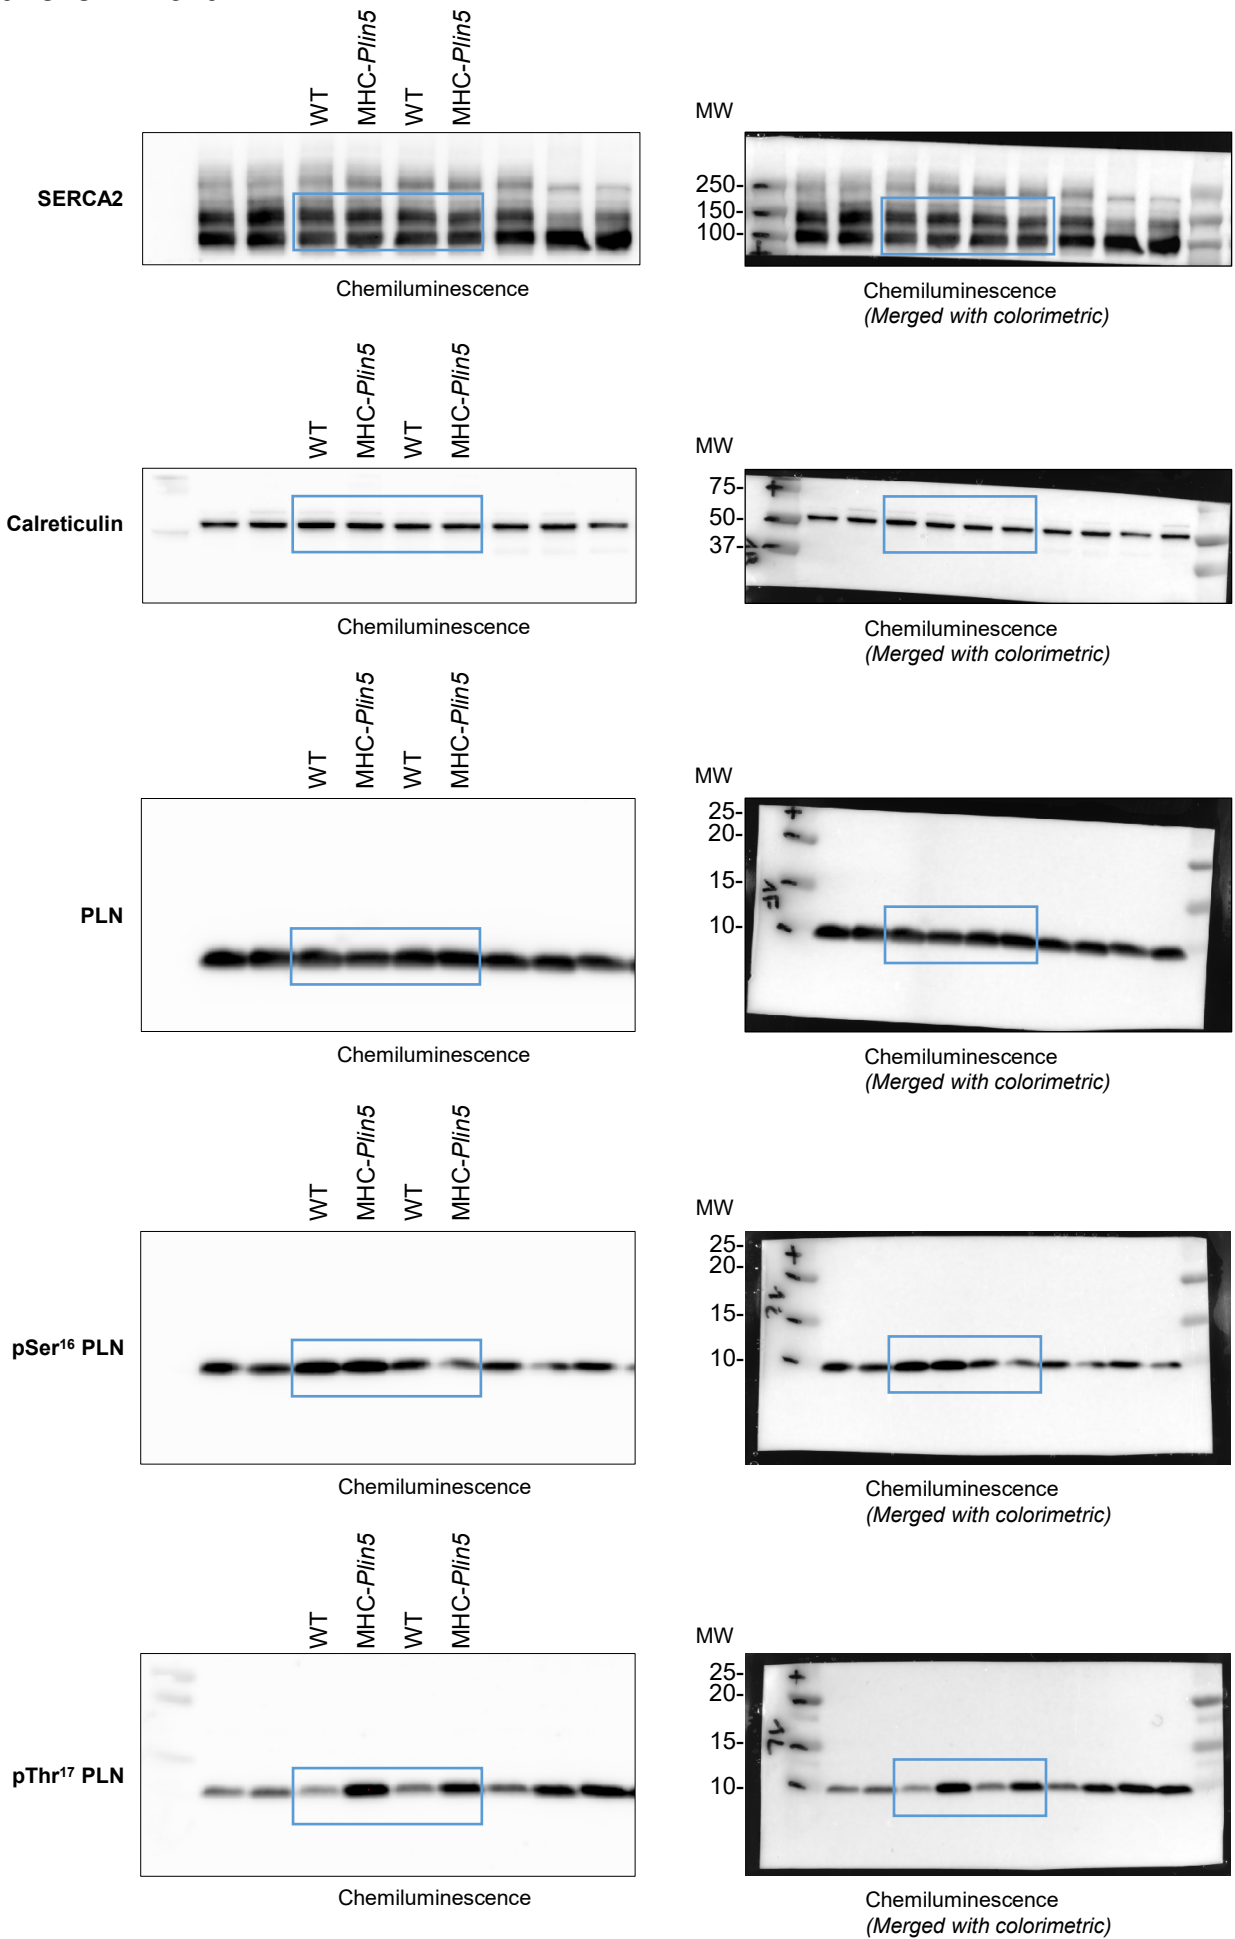

Figure 5B-Part2

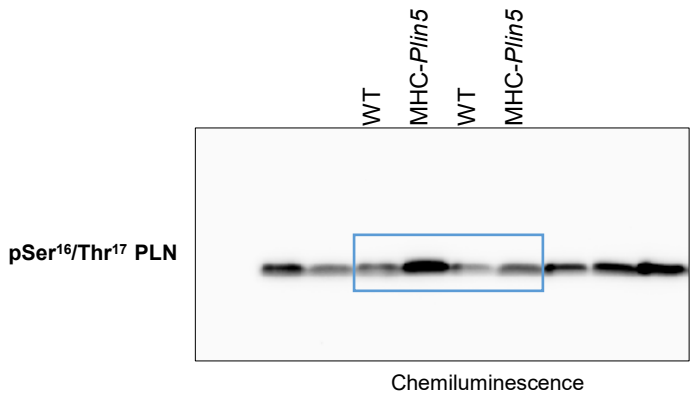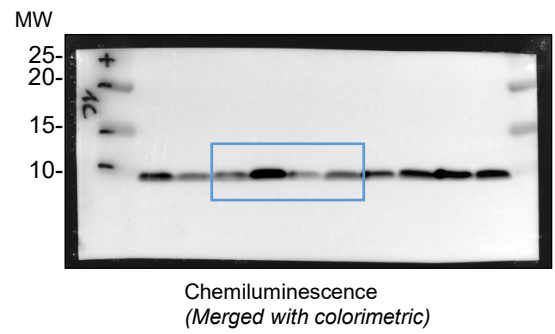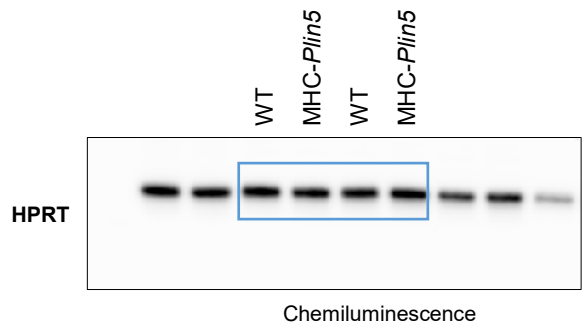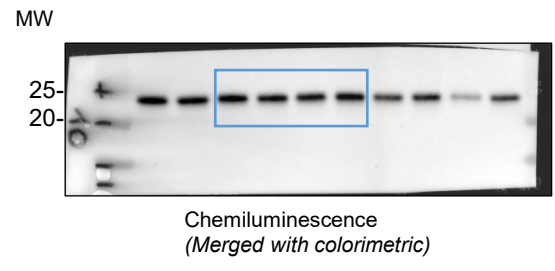

Figure S1B

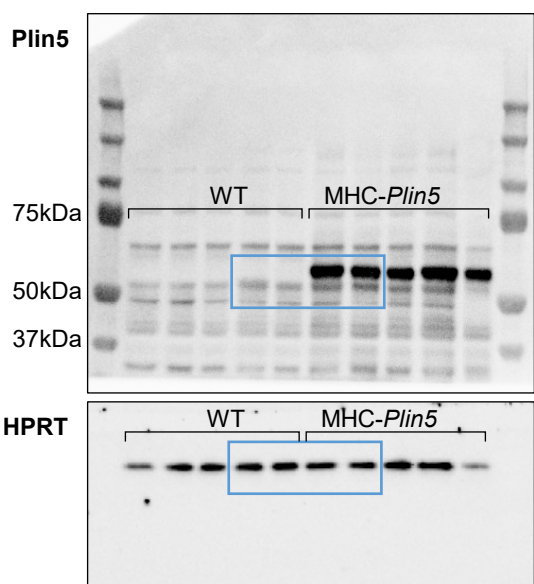

Figure S1D

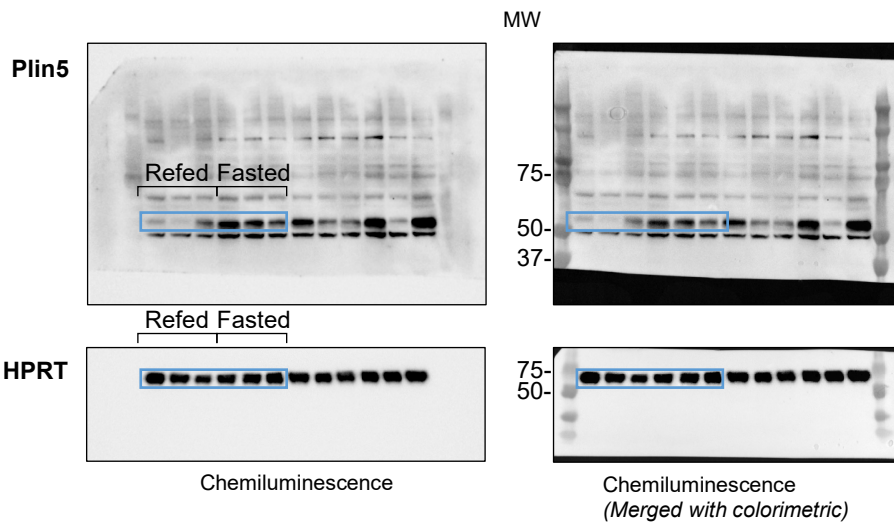

Figure S2A

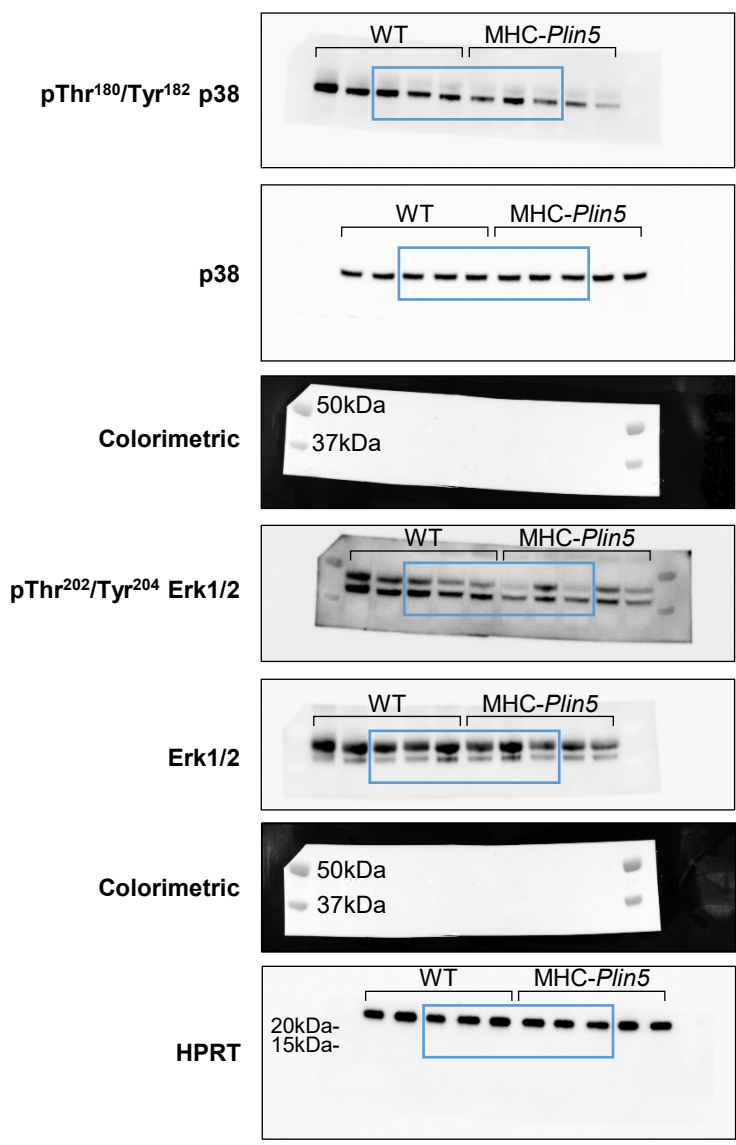



Figure S2C

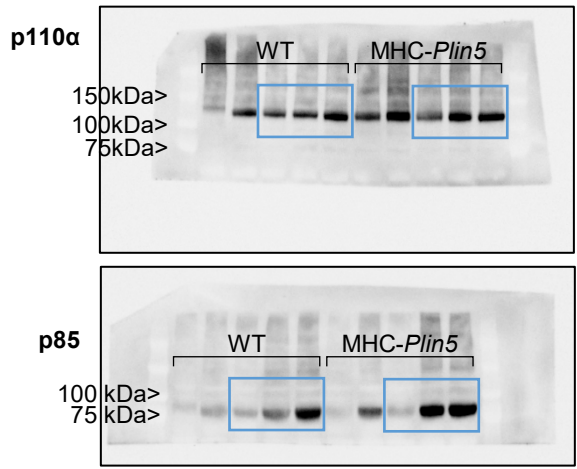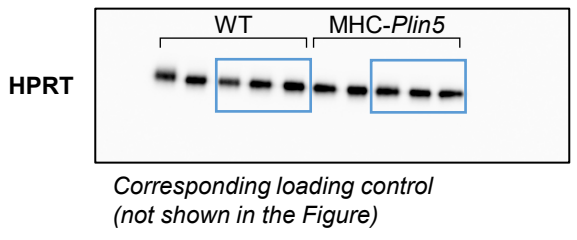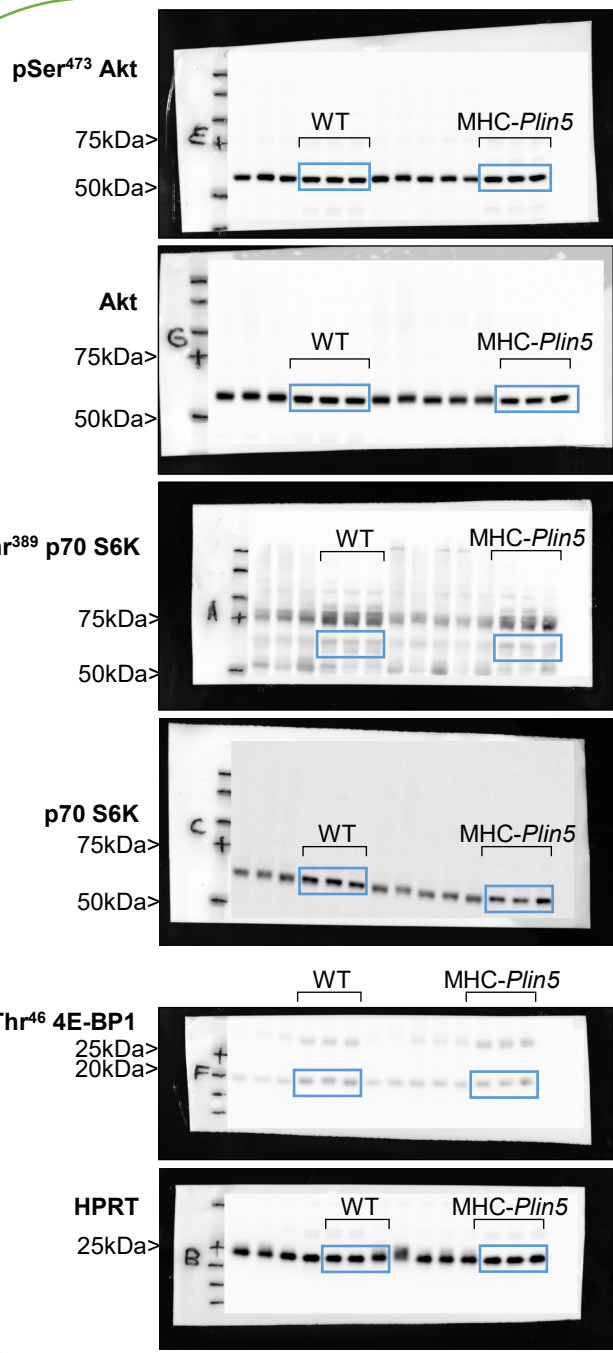

Figure S4A

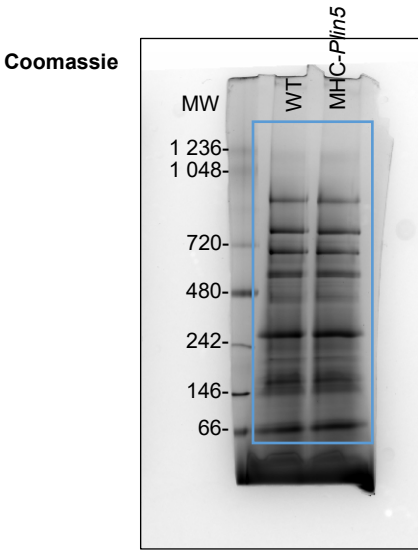

Figure S4B

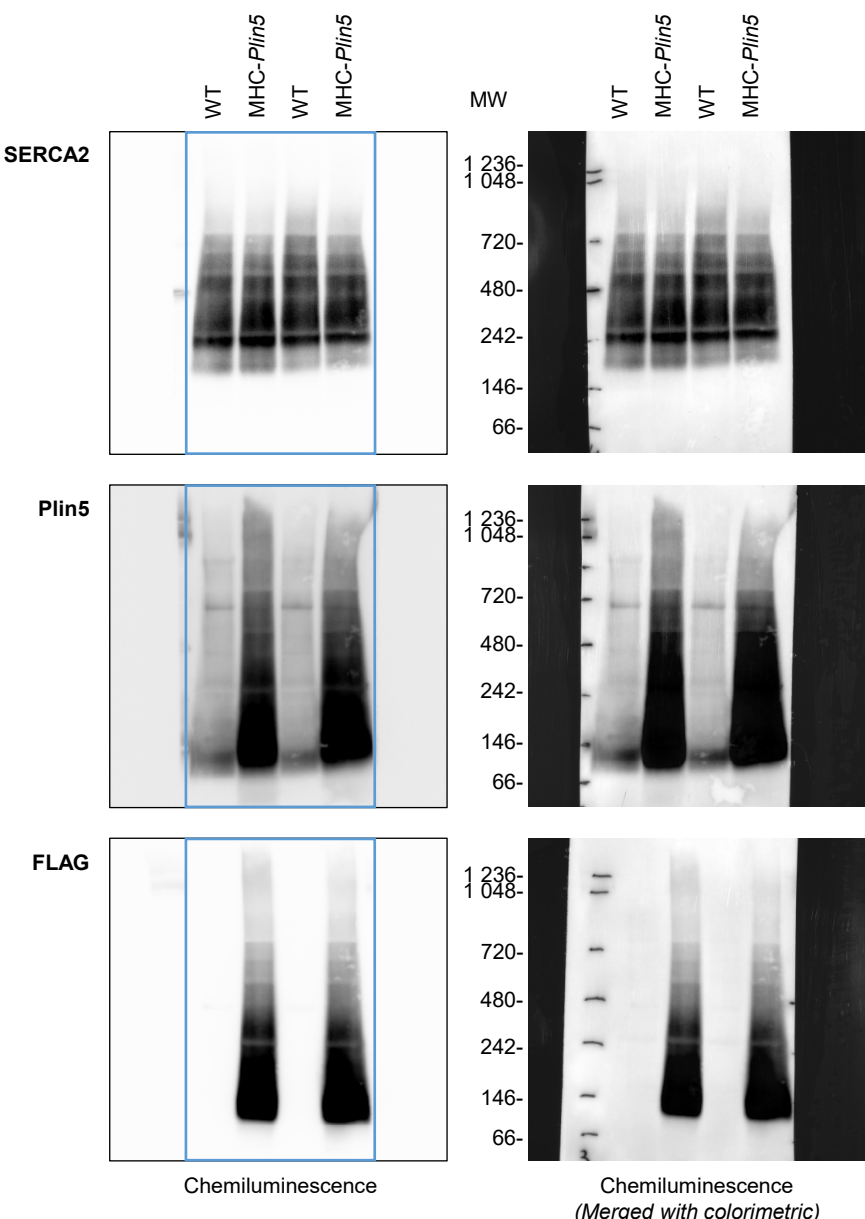

**Figure S4C**  
(Horizontal 1D BN PAGE: see Figure S4A)

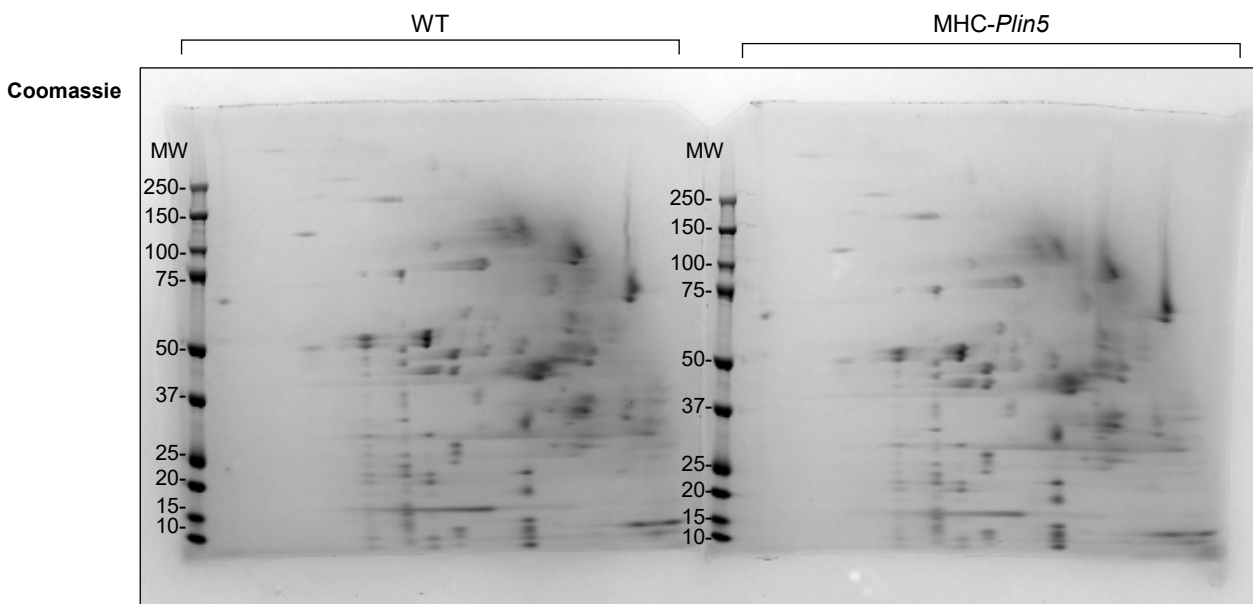

**Figure S4D**  
(Horizontal 1D BN PAGE: see Figure S4B)

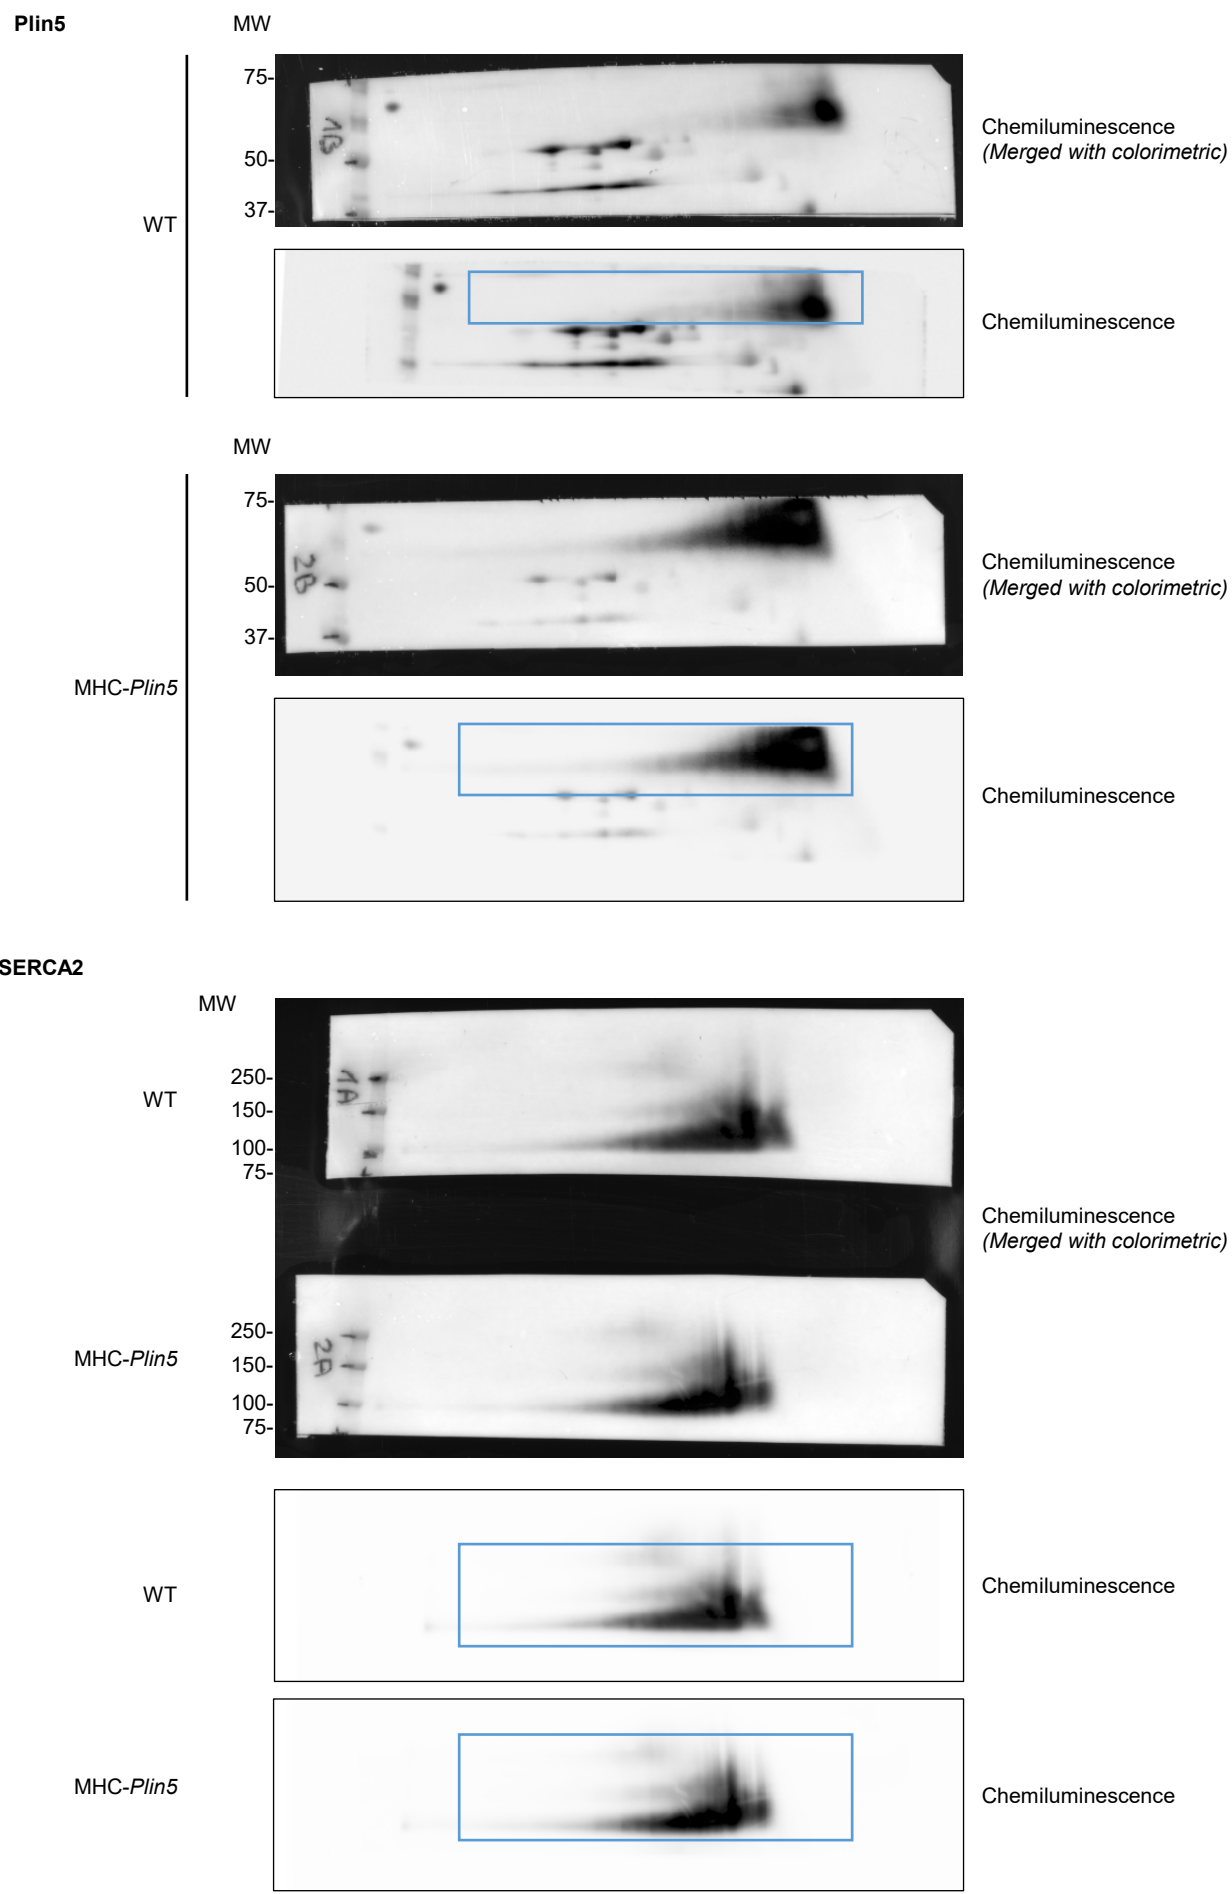

Supplement: LSA-2022-01690_SdataF3_F4_F5_FS1_FS2_FS4.pdf [file LSA-2022-01690_SdataF3_F4_F5_FS1_FS2_FS4.pdf]
